# Supplementary material for: Adoptive Transfer of Photosensitizer-Loaded Cytotoxic T Cells for Combinational Photodynamic Therapy and Cancer Immuno-Therapy
Source: MDPI journal article supplement (doi:10.3390/pharmaceutics15041295), 2023-04-20
Supplement: s1 [file s1]

## Supplementary Information for

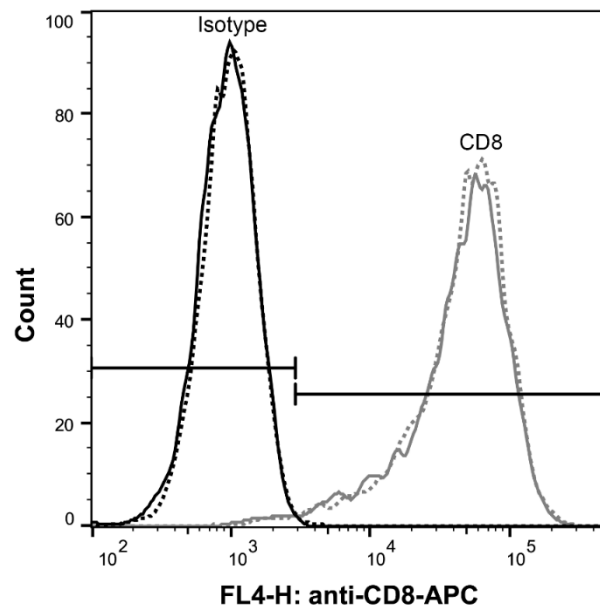

**Figure S1.** The CD8 expression of OT-1 cells, as confirmed by Flow cytometer.

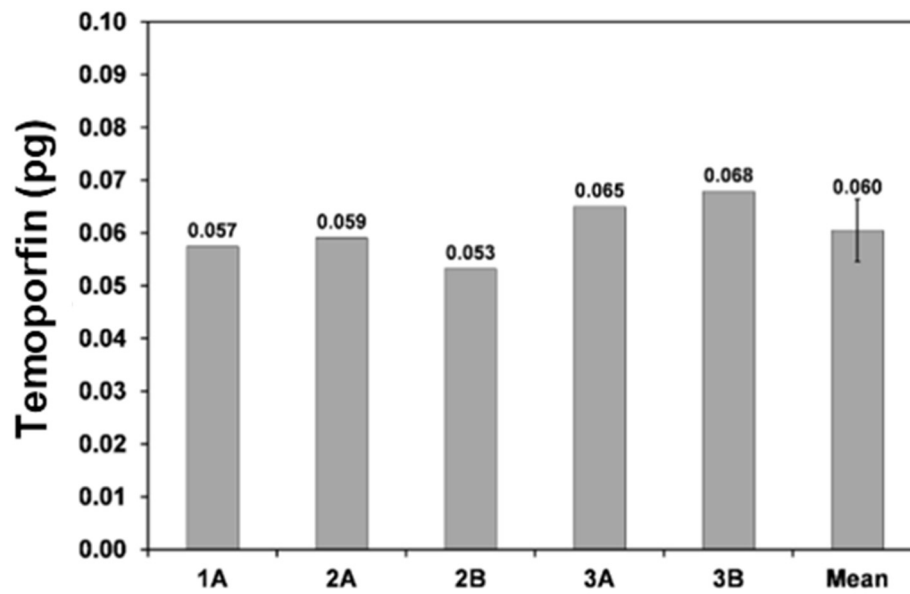

**Figure S2.** Quantitative analysis of loaded temoporfin in the OT-1 cells.

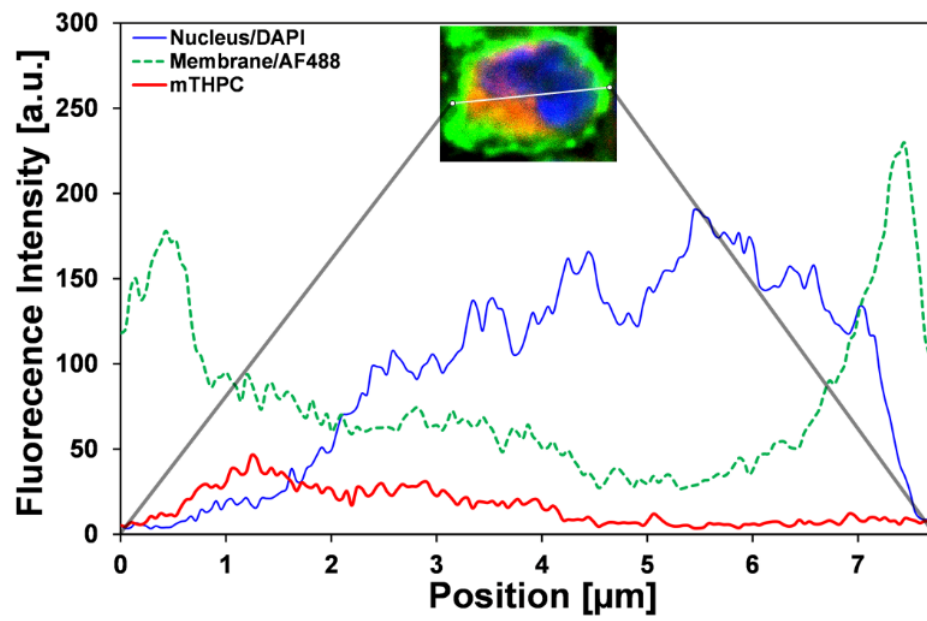

**Figure S3.** Fluorescence intensity profile of PS-OT-1 cells.
